# Supplementary material
Source: publisher figshare collection journal article supplement (https://gsajournals.figshare.com/ndownloader/files/19295930)
Supplement: Supplementary file 1 [file 19295930]

Table S2. Primers utilized for quantitative RT-PCR

| **#** | **Primer pair** | **F sequence** | **R sequence** |
| --- | --- | --- | --- |
| 1 | *atl-1* | gcattctcctgcgttttctc | cgtcgaaccttcgtcttctc |
| 2 | *atm-1* | cccgattctgattgaaggaa | ggcttctcggaaatttgtc |
| 3 | *cep-1* | ttccgacgcaagtagtctcc | ccgtttgcattgaacaacac |
| 4 | *chk-1* | gtctggtcgtctgggattgt | ttgctgatccatcccatgta |
| 5 | *clk-2* | ccgaatcctccatcttcaaa | gtgcaatgatcagacgcact |
| 6 | *dsb-1* | ccatcgccacagttcgtcat | gaaatgaaggtgcgtttgc |
| 7 | *dsb-2* | cgtcgaaccaaatatctctaagc | catgcaatactcatcgtcagc |
| 8 | *hus-1* | aagatactgcggcaatcgac | tgaaccaacttccaccatca |
| 9 | *mre-11* | ctgtttggaaagcacagcaa | ttgaatgctcgaacaagacg |
| 10 | *mrt-2* | tagaaacgggtcaatgcaca | gtgccacgttcctgtatcct |
| 11 | *msh-5* | ccccaaaacagctttccata | ggcgtcttgaatggatcact |
| 12 | *prmt-5* | aacttgtggaccgttggaag | ggcacttggaattgatgctt |
| 13 | *rad-51* | ccaggctgatgctaaaaagc | ttcggcttctggtaaattgg |
| 14 | *rad-54* | cgtcttcgaatgtggatcg | gtcgttttcttcggcttcag |
| 15 | *spo-11* | tggacctacgaaagaatttgc | tgatcgatggtgaaacgatg |
| 16 | *ctl-2* | ggttaacaaggacggaaaggc | cggatggaatagtctgggtcc |
| 17 | *sod-1* | gtcgctgttcttcgtggaga | tggaatccatgaagaccggg |
| 18 | *gpx-4* | agtacaccgatttcaacccca | tcgtgattctctgcaggttct |
| 19 | *gst-4* | catttggccagcttcccatt | cgtaagcttcttcctctgcagt |
| 20 | *tba-1* | tcaacactgccatcgccgcc | tccaagcgagaccaggcttcag |
